# Supplementary material
Source: PubMed Central journal article supplement (PMC10408258)

## Supplemental Online Content

Hailu R, Mehrotra A, Huskamp HA, Busch AB, Barnett ML. Telemedicine use and quality of opioid use disorder treatment in the US during the COVID-19 pandemic. *JAMA Netw Open*. 2023;6(1):e2252381. doi:10.1001/jamanetworkopen.2022.52381

**eTable 1.** Facility Medications for Opioid Use Disorder (MOUD)

**eTable 2.** Classification of Outpatient Visits

**eTable 3.** Confirmatory Diagnosis CPT Codes

**eTable 4.** Outpatient Visits (OUD and Non-OUD) Outcomes

**eTable 5.** Outcome Descriptions

**eFigure.** OUD Cohort Creation

This supplementary material has been provided by the authors to give readers additional information about their work.

**eTable 1.** Facility Medications for Opioid Use Disorder (MOUD)

| <b>Medication</b>                    | <b>HCPCS Codes</b>                                        |
|--------------------------------------|-----------------------------------------------------------|
| Buprenorphine/naloxone               | J0572, J0573, J0575                                       |
| Long-acting injectable<br>naltrexone | J2315<br>HZ84ZZZ or HZ94ZZZ, but no AUD diagnosis (F10.x) |
| Buprenorphine without naloxone       | J0571 (indicated for pregnant women receiving MOUD)       |

**eTable 2.** Classification of Outpatient Visits

|                         | <b>HCPCS Codes</b>                                                                                                                                                                                                                                                                                                                                                                                                                                                                                                                                                                                                                                                                                                                                                                                                                                                                   |
|-------------------------|--------------------------------------------------------------------------------------------------------------------------------------------------------------------------------------------------------------------------------------------------------------------------------------------------------------------------------------------------------------------------------------------------------------------------------------------------------------------------------------------------------------------------------------------------------------------------------------------------------------------------------------------------------------------------------------------------------------------------------------------------------------------------------------------------------------------------------------------------------------------------------------|
| <b>Outpatient Codes</b> | 90791-90792, 90832-90840, 90845-90849, 90853, 90857, 90865, 90867-90871, 90875-90876, 90880, 90900-90902, 90904, 90906, 90908, 90910, 97003, 97004, 98960-98962, 99058, 99078, 99201-99205, 99211-99215, 99241-99245, 99341-99345, 99347-99350, 99382-99387, 99392-99397, 99401-99404, 99408, 99409, 99411, 99412, 99420, 99441-99443, 99843, 99490, 99495, 99496, 99510, 0359T-0374T, G0155, G0175, G0351, G0396, G0397, G0438, G0439, G0442, G0443, G0463, G0466-G0470, G0505, G0507, G0513-G0515, G2025, G2067-G2080, G2086-G2088, H0001-H0007, H0014, H0016, H0022, H0023, H0028, H0029, H0031, H0034, H0036-H0050, H1011, H2000, H2001, H2010-H2033, H2037, H5010, H5020, H5025, H5030, H5220, H5230, H5240, H5299, M0064, S9454, S9482, S9484, S9485, T1006, T1007, T1011, T1012, T1015-T1018, T1023-T1027, T1040, T1041, T2010-T2015, T2018-T2024, T2036, T2037, Z0001, Z0002 |

We excluded all HCPCS codes that were specific for clinical settings outside of clinician offices (e.g., emergency departments, hospital inpatient, nursing home or dialysis facility codes). Below is the list of the HCPCS codes specific to outpatient care that were included in our analysis.

**eTable 3.** Confirmatory Diagnosis CPT Codes

|                                                                                     |                                                                                                                                                                           |
|-------------------------------------------------------------------------------------|---------------------------------------------------------------------------------------------------------------------------------------------------------------------------|
| <b>Opioid Dependence</b>                                                            | F11.2                                                                                                                                                                     |
| <b>Opioid Use or Abuse</b>                                                          | F11.1 F11.9                                                                                                                                                               |
| <b>Opioid Overdose</b>                                                              | T40.0X1, T40.0X2, T40.0X4, T40.0X5, T40.1X1, T40.1X2, T40.1X4, T40.2X1, T40.2X2, T40.2X4, T40.2X5, T40.3X1, T40.3X2, T40.3X4, T40.3X5, T40.4X1, T40.4X2, T40.4X4, T40.4X5 |
| <b>Hepatitis C</b>                                                                  | B17.1, B18.2, Z22.52                                                                                                                                                      |
| <b>Potentially Injection-related Infection</b>                                      |                                                                                                                                                                           |
| Phlebitis                                                                           | I80.1-I80.9                                                                                                                                                               |
| Abscess and/or Cellulitis                                                           | G06.1, G06.2, L02.0-L02.4, L02.91, L03.0-L03.9, L98.3                                                                                                                     |
| Infectious Arthritis                                                                | M00.x                                                                                                                                                                     |
| Infectious Endocarditis                                                             | B37.6, I33.0, I33.9, I38, I39                                                                                                                                             |
| <b>Inpatient Detox/Rehabilitation Treatment Center</b>                              |                                                                                                                                                                           |
| ≥1 of Following Revenue International Classification of Diseases-10 Procedure Codes |                                                                                                                                                                           |
| Revenue                                                                             | 0116, 0126, 0136, 0146, 0156, 0118, 0128, 0138, 0158, 1002                                                                                                                |
| ICD-10                                                                              | HZ.x                                                                                                                                                                      |
| PLUS ≥ 1 of Following ICD-10 Diagnosis Codes                                        |                                                                                                                                                                           |
| ICD-10                                                                              | F11.x                                                                                                                                                                     |

This table shows the list of codes for a confirmatory diagnosis or event — opioid overdose, hepatitis C (an infection potentially secondary to injection drug use), or an inpatient detox or rehabilitation treatment.

Codes adapted from:

*Larochelle, M. R., Wakeman, S. E., Ameli, O., Chaisson, C. E., McPheeters, J. T., Crown, W. H., Azocar, F., & Sanghavi, D. M. (2020). Relative Cost Differences of Initial Treatment Strategies for Newly Diagnosed Opioid Use Disorder: A Cohort Study. Medical Care, 58(10), 919–926.*

**eTable 4.** Outpatient Visits (OUD and Non-OUD) Outcomes

Unadjusted outpatient utilization rates are listed below.

|                                                                  | Provider Telemedicine Use Group |         |         |         |         |         |
|------------------------------------------------------------------|---------------------------------|---------|---------|---------|---------|---------|
|                                                                  | Low                             |         | Medium  |         | High    |         |
|                                                                  | Pre*                            | Post**  | Pre*    | Post**  | Pre*    | Post**  |
| Providers (n)                                                    | 589                             | 589     | 590     | 590     | 589     | 589     |
| Enrollees with OUD (n)                                           | 2095                            | 2102    | 2240    | 2068    | 1655    | 1641    |
| <b>Outpatient Visits</b>                                         |                                 |         |         |         |         |         |
| Total In-Person                                                  | 253,362                         | 236,244 | 268,710 | 210,237 | 204,612 | 66,602  |
| Total Telemedicine                                               | 84                              | 6,578   | 582     | 53,853  | 3,113   | 155,041 |
| Percent Telemedicine (%)                                         | 0.08                            | 2.1     | 0.36    | 20.9    | 2.1     | 69.5    |
| <b>Average Number of Outpatient Visits per Enrollee with OUD</b> |                                 |         |         |         |         |         |
| Total                                                            | 18.0                            | 17.8    | 17.6    | 18.4    | 17.4    | 18.1    |
| In-person                                                        | 18.0                            | 15.6    | 17.5    | 13.8    | 17.2    | 10.3    |
| Telemedicine                                                     | 0.0                             | 2.2     | 0.1     | 4.5     | 0.2     | 7.9     |

\*Pre: March 14<sup>th</sup>, 2019 – March 13<sup>th</sup>, 2020

\*\*Post: March 14<sup>th</sup>, 2020 – March 13<sup>th</sup>, 2021

**eTable 5.** Outcome Descriptions

| <b>Outcome</b>                                                                                          | <b>Description</b>                                                                                                                                                                                                                                                                     |
|---------------------------------------------------------------------------------------------------------|----------------------------------------------------------------------------------------------------------------------------------------------------------------------------------------------------------------------------------------------------------------------------------------|
| <p>           OUD Outpatient Visits         </p>                                                        | <p>           The total number of OUD outpatient visits within the 90 days after the enrollees' index visit.         </p>                                                                                                                                                              |
| <p>           OUD Visit Volume         </p>                                                             | <p>           Across all OUD enrollees, the average number of outpatient visits each enrollee has throughout their 90-day episode         </p>                                                                                                                                         |
| <p> <math>\geq 1</math> MOUD fill within 14 days         </p>                                           | <p>           The percentage of enrollees who have at least 1 OUD outpatient visit and at least 1 MOUD fill within 14 days of their index visit         </p>                                                                                                                           |
| <p> <math>\geq 1</math> MOUD fill within 90 days         </p>                                           | <p>           The percentage of enrollees who have at least 1 OUD outpatient visit and at least 1 MOUD fill within 90 days of their index visit         </p>                                                                                                                           |
| <p> <math>\geq 1</math> MOUD fill within 30-90 days among those with a fill within 14 days         </p> | <p>           The percentage of enrollees who have at least 1 more fill between the 30-90 days after their index visit, among those who have at least 1 MOUD fill within the 14 days of their index visit.         </p>                                                                |
| <p>           MOUD Days-Supply Among Those <math>\geq 1</math> MOUD fill         </p>                   | <p>           The average days-supply among enrollees with at least 1 MOUD fill         </p>                                                                                                                                                                                           |
| <p>           OUD-Related Event within 90 Days Following Index Visit (%)         </p>                   | <p>           The percentage of enrollees with an OUD-related event within the 90 days after their index visit. OUD related events included in this outcome are: overdose, detoxification/rehabilitation, injection-related infections, and the aggregate of these three.         </p> |

**eFigure. OUD Cohort Creation**

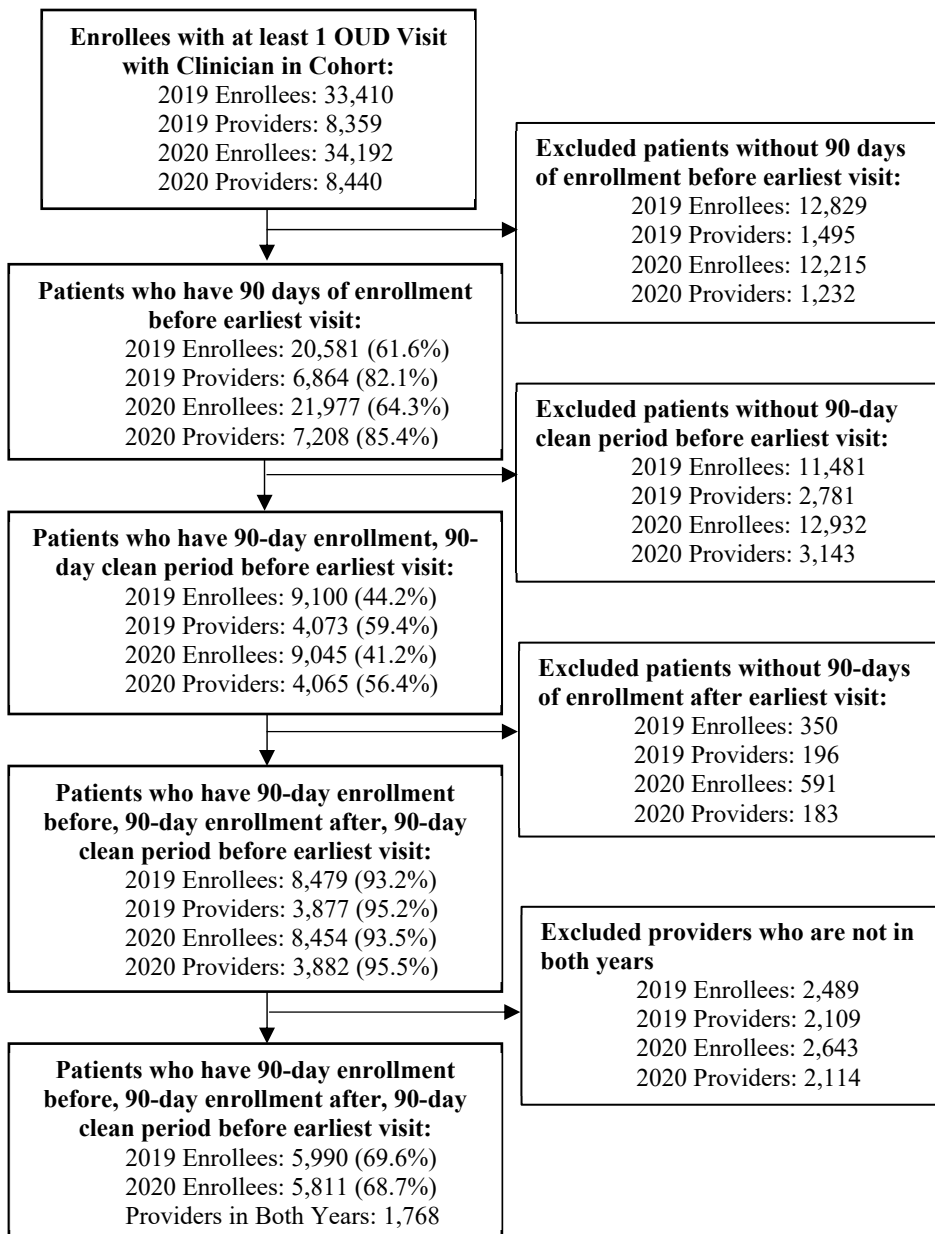

Supplement: jamanetwopen-e2252381-s001.pdf [file jamanetwopen-e2252381-s001.pdf]
