# Supplementary material
Source: PubMed Central journal article supplement (PMC10408258)
Supplement: jamanetwopen-e2252381-s002.pdf [file jamanetwopen-e2252381-s002.pdf]

## Data Sharing Statement

Hailu. Telemedicine Use and Quality of Opioid Use Disorder Treatment in the US During the COVID-19 Pandemic. *JAMA Netw Open*. Published January 24, 2023.

doi:10.1001/jamanetworkopen.2022.52381

### Data

**Data available:** No

### Additional Information

**Explanation for why data not available:** The dataset used is proprietary, but available for qualified researchers via application.
